# Supplementary material for: Multifunctional nanoprobes combined with radiotherapy and hypoxia-activated therapy synergistically improve antitumor efficacy
Source: Royal Society of Chemistry journal article supplement (doi:10.1039/d2ra04690c), 2022-01-01
Supplement: d2ra04690c1.pdf [file d2ra04690c1.pdf]

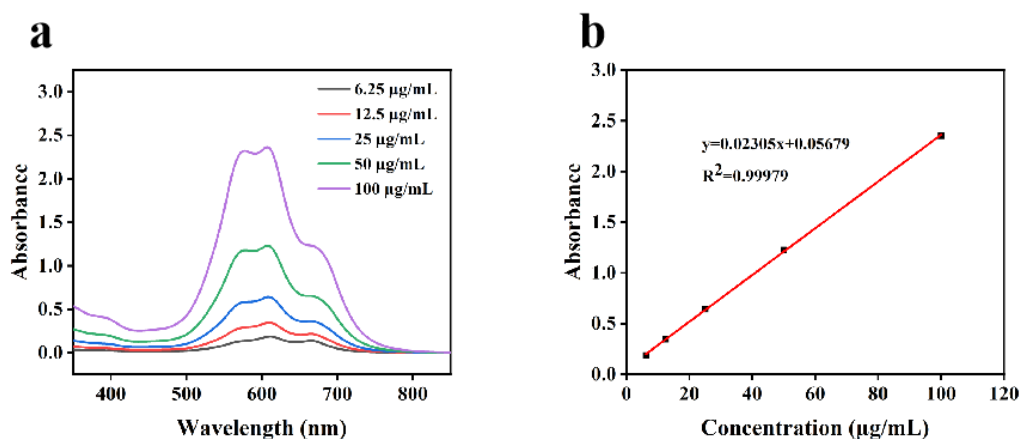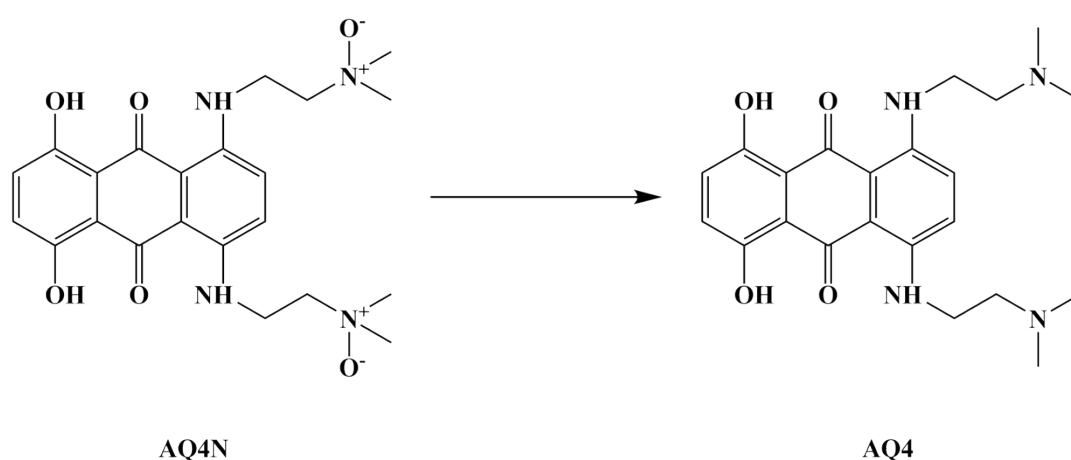

## 6. Conflicts of interest

The authors declare no competing financial interests.

## 7. Acknowledgements

This work was supported by National Key R&D Program of China (2021YFC2500402), National Natural Science Foundation of China (82171932, 82001909, 81701826, 81971673), Key Program of the Tianjin Health and Family Planning Commission (16KG115), Tianjin Health Research Project (TJWJ2022MS010, TJWJ2021QN035).
